# Supplementary material for: The Construction of Multi-ethnic Polygenic Risk Score using Transfer Learning
Source: bioRxiv or medRxiv preprint supplement (doi:10.1101/2022.03.08.22272114), 2022-03-10
Supplement: Supplementary file [file media-1.pdf]

## Supplementary Materials

### Supplement 1. Derivation of gradient descent algorithm (Equation 1)

When carrying out gradient descent algorithm, our goal is to minimize the following loss function:

$$Loss = (Y - G\beta - C\gamma)^2.$$

with respect to  $\beta_j$  for each  $j$  in turn. The first and second derivative of loss function is

$$\frac{\partial Loss}{\partial \beta_j} = -2G_j^T(Y - G\beta - C\gamma), \quad \frac{\partial^2 Loss}{\partial \beta_j^2} = 2G_j^T G > 0.$$

Since the second derivative is constantly larger than 0, the iterative formula of gradient descent can be used:

$$\beta_j^{(r+1)} = \beta_j^{(r)} - \alpha' \frac{\partial Loss}{\partial \beta_j} = \beta_j^{(r)} + 2\alpha' G_j^T (Y - G\beta^{(i)} - C\gamma),$$

and we define the learning rate  $\alpha = 2\alpha'$ .

# Supplementary Figures

**Figure S1.** Prediction accuracy of TL-PRS(ind) and TL-PRS methods in simulations. Different genetic designs (0.1% and 1% causal variants) were simulated as well as cross-population genetic correlations (0.4, 0.7 and 1.0). Heritability was fixed at 50%. Prediction accuracy was measured by the squared correlation ( $R^2$ ) between the simulated and predicted phenotypes in the testing dataset, averaged across 20 simulation replicates. Error bar indicates the standard deviation of  $R^2$  across simulation replicates.

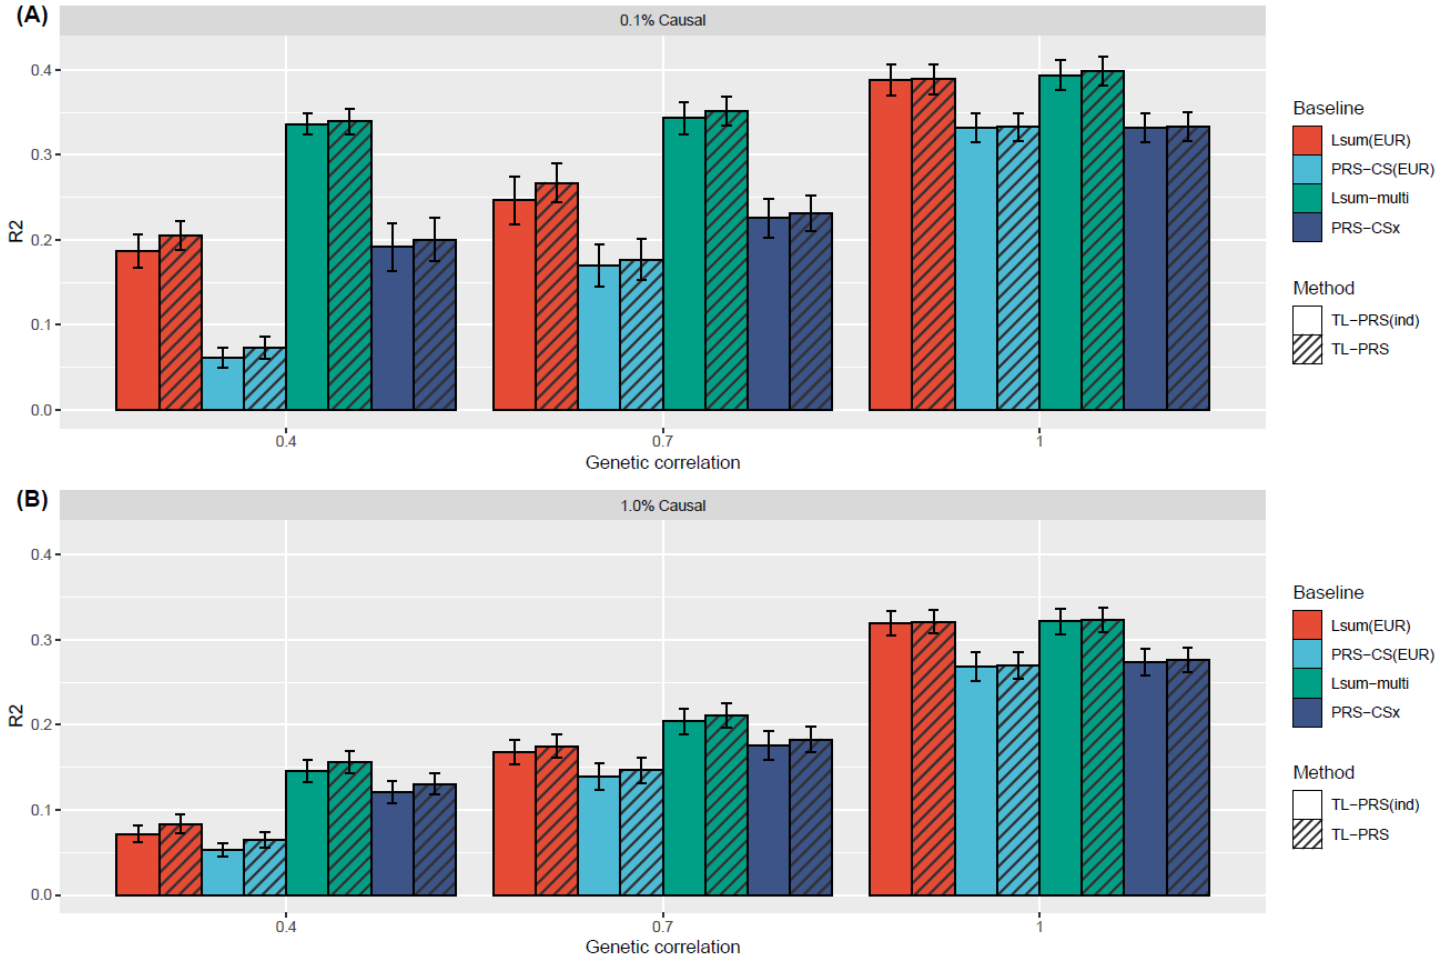

**Figure S2.** Cumulant event plot in terms of the top 10% PRS constructed by transfer learning methods and their baseline methods.

(a) South Asian, Type 2 diabetes, Case: Control=419:2211

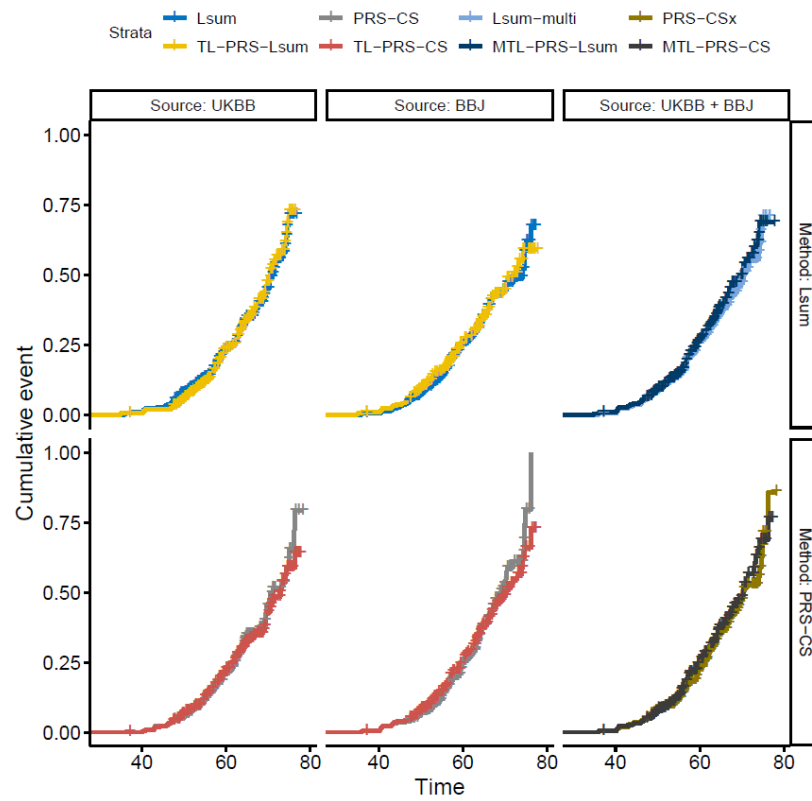

(b) South Asian, Coronary artery disease, Case: Control=362:2270

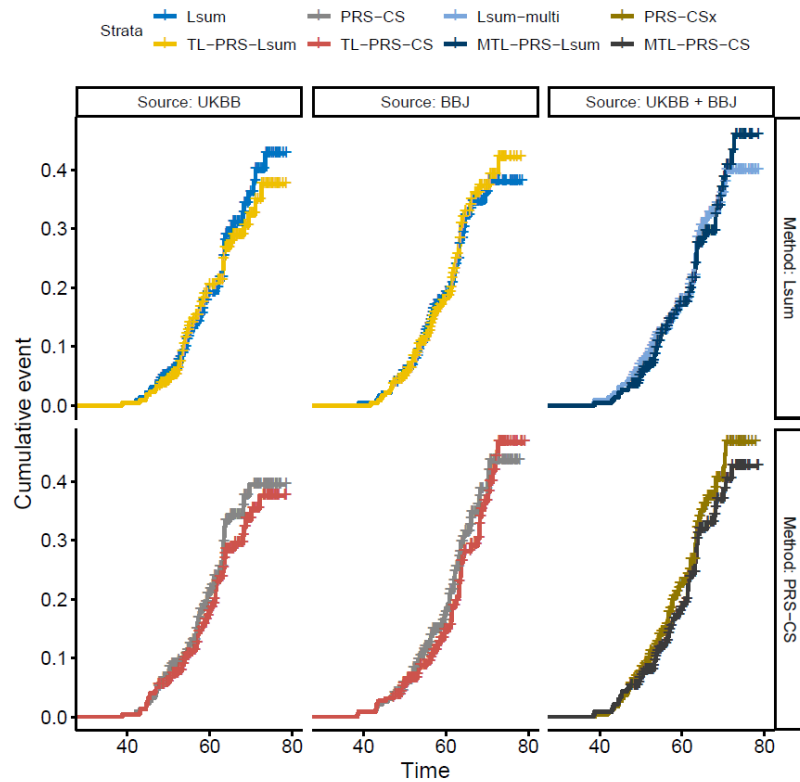

(c) African, Type 2 diabetes, Case: Control=177:1812

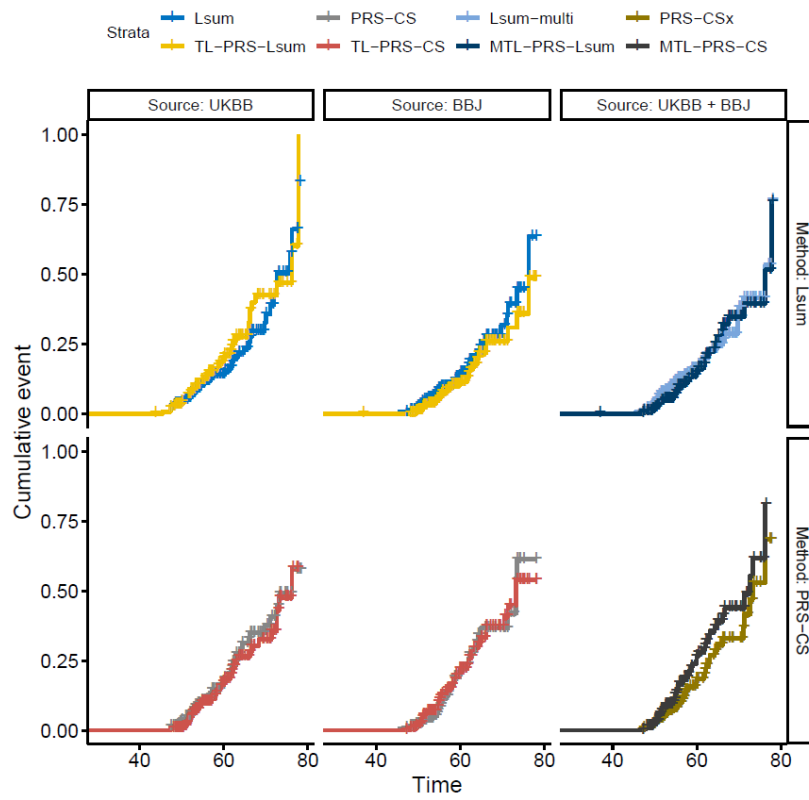

(d) African, Coronary artery disease, Case: Control=94:1902

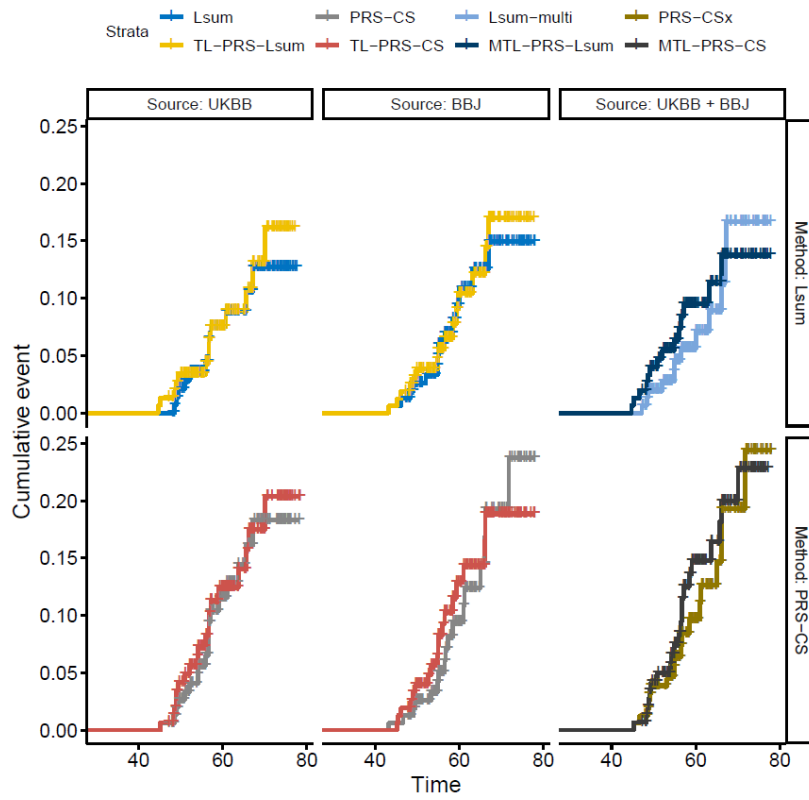

## Supplementary Tables

**Table S1. The implementation of prediction methods in the simulation and application of UK Biobank**

(a) The implementation of single-source prediction methods.

| Method      | Training data                                                                                                                     | Validation data                                                                           | Testing data                                              |
|-------------|-----------------------------------------------------------------------------------------------------------------------------------|-------------------------------------------------------------------------------------------|-----------------------------------------------------------|
| PT          | Select the hyperparameters using the combination of training and validation data. Individual-level data are required.             |                                                                                           | Assess prediction performance using individual-level data |
| Lsum        | Select the hyperparameters using the combination of training and validation data. Individual-level data are required.             |                                                                                           | Assess prediction performance using individual-level data |
| PRS-CS      | Select the hyperparameters using the combination of training and validation data. Individual-level data are <b>not</b> required.  |                                                                                           | Assess prediction performance using individual-level data |
| TL-PRS-Lsum | Train the baseline Lsum model using training data, and then implement TL-PRS-Lsum. Individual-level data are <b>not</b> required. | Fine-tune TL-PRS-Lsum model using validation data. Individual-level data are recommended. | Assess prediction performance using individual-level data |
| TL-PRS-CS   | Train the baseline PRS-CS model using training data, and then implement TL-PRS-CS. Individual-level data are <b>not</b> required. | Fine-tune TL-PRS-CS model using validation data. Individual-level data are recommended.   | Assess prediction performance using individual-level data |

(b) The implementation of multi-source prediction methods.

| Method                                        | Training data                                                                                                                                                                                                    | Validation data                                                                      | Testing data                                              |
|-----------------------------------------------|------------------------------------------------------------------------------------------------------------------------------------------------------------------------------------------------------------------|--------------------------------------------------------------------------------------|-----------------------------------------------------------|
| PT-multi<br>Lsum-multi<br>PRS-CS <sub>x</sub> | Select the weights (hyperparameter) to linearly combine single-source prediction models using combination of training and validation data. Individual-level data are required to fine-tune the weight parameter. |                                                                                      | Assess prediction performance using individual-level data |
| MTL-PRS-Lsum<br>MTL-PRS-CS                    | Train the baseline Lsum-multi/PRS-CS <sub>x</sub> model using training data, and then implement TL-PRS. Individual-level data are <b>not</b> required.                                                           | Fine-tune TL-PRS model using validation data. Individual-level data are recommended. | Assess prediction performance using individual-level data |

**Table S2.** List of data sets used in simulations and analyses of real phenotypes.

| Target Population | Trait                          | Total sample size | Training sample size | Validation sample size | Testing sample size |
|-------------------|--------------------------------|-------------------|----------------------|------------------------|---------------------|
| South Asian (SAS) | Simulation and real phenotypes | 10,285            | 5,000                | 2,635                  | 2,635               |
| African (AFR)     | real phenotypes                | 8,168             | 4,000                | 2,169                  | 1,999               |

**Table S3.** The model requirement of TL-PRS and TL-PRS (ind).

| Methods      | Training dataset                | Validation dataset                     | Testing dataset                                                |
|--------------|---------------------------------|----------------------------------------|----------------------------------------------------------------|
| TL-PRS       | Only require summary statistics | Individual-level data are recommended. | Require individual-level data to assess prediction performance |
| TL-PRS (ind) | Require individual-level data   | Require individual-level data          | Require individual-level data to assess prediction performance |

**Table S4.** Prediction accuracy of different PRS construction methods in analyses of eight traits in the South Asian cohort of UK Biobank. The approach with highest prediction  $R^2$  is highlighted with bold.

(a) HDL

| Model              | Prediction R <sup>2</sup> of PRS | Mean difference between top 10% and bottom 10% PRS |
|--------------------|----------------------------------|----------------------------------------------------|
| PT (UKBB)          | 0.07                             | 0.301                                              |
| Lsum (UKBB)        | 0.092                            | 0.323                                              |
| TL-PRS-Lsum (UKBB) | 0.099                            | 0.355                                              |
| PRS-CS (UKBB)      | 0.101                            | 0.332                                              |
| TL-PRS-CS (UKBB)   | 0.109                            | 0.376                                              |
| PT (BBJ)           | 0.044                            | 0.225                                              |
| Lsum (BBJ)         | 0.061                            | 0.291                                              |
| TL-Lsum (BBJ)      | 0.065                            | 0.293                                              |
| PRS-CS (BBJ)       | 0.046                            | 0.208                                              |
| TL-PRS-CS (BBJ)    | 0.062                            | 0.276                                              |
| PT-multi           | 0.082                            | 0.328                                              |
| Lsum-multi         | 0.105                            | 0.367                                              |
| MTL-PRS-Lsum       | 0.111                            | 0.38                                               |
| PRSCSx             | 0.107                            | 0.344                                              |
| <b>MTL-PRS-CS</b>  | <b>0.117</b>                     | <b>0.369</b>                                       |

## (b) LDL

| Model               | Prediction<br>R2 of PRS | Mean difference<br>between top 10%<br>and bottom 10%<br>PRS |
|---------------------|-------------------------|-------------------------------------------------------------|
| PT (UKBB)           | 0.02                    | 0.448                                                       |
| Lsum (UKBB)         | 0.023                   | 0.534                                                       |
| TL-PRS-Lsum (UKBB)  | 0.024                   | 0.575                                                       |
| PRS-CS (UKBB)       | 0.02                    | 0.429                                                       |
| TL-PRS-CS (UKBB)    | 0.024                   | 0.509                                                       |
| PT (BBJ)            | 0.012                   | 0.243                                                       |
| Lsum (BBJ)          | 0.019                   | 0.432                                                       |
| TL-Lsum (BBJ)       | 0.019                   | 0.48                                                        |
| PRS-CS (BBJ)        | 0.007                   | 0.22                                                        |
| TL-PRS-CS (BBJ)     | 0.013                   | 0.383                                                       |
| PT-multi            | 0.024                   | 0.548                                                       |
| Lsum-multi          | 0.03                    | 0.543                                                       |
| <b>MTL-PRS-Lsum</b> | <b>0.031</b>            | <b>0.533</b>                                                |
| PRSCSx              | 0.022                   | 0.475                                                       |
| MTL-PRS-CS          | 0.026                   | 0.425                                                       |



## (c) BMI

| Model              | Prediction<br>R2 of PRS | Mean difference<br>between top 10%<br>and bottom 10%<br>PRS |
|--------------------|-------------------------|-------------------------------------------------------------|
| PT (UKBB)          | 0.047                   | 3.025                                                       |
| Lsum (UKBB)        | 0.072                   | 3.918                                                       |
| TL-PRS-Lsum (UKBB) | 0.073                   | 4.053                                                       |
| PRS-CS (UKBB)      | 0.067                   | 3.972                                                       |
| TL-PRS-CS (UKBB)   | 0.073                   | 4.155                                                       |
| PT (BBJ)           | 0.017                   | 1.951                                                       |
| Lsum (BBJ)         | 0.022                   | 2.404                                                       |
| TL-Lsum (BBJ)      | 0.025                   | 2.633                                                       |
| PRS-CS (BBJ)       | 0.023                   | 2.083                                                       |
| TL-PRS-CS (BBJ)    | 0.028                   | 2.072                                                       |
| PT-multi           | 0.055                   | 3.754                                                       |
| <b>Lsum-multi</b>  | <b>0.077</b>            | <b>4.157</b>                                                |
| MTL-PRS-Lsum       | 0.076                   | 4.162                                                       |
| PRSCSx             | 0.071                   | 3.817                                                       |
| MTL-PRS-CS         | 0.075                   | 4.291                                                       |

(d) TG

| Model              | Prediction<br>R2 of PRS | Mean difference<br>between top 10%<br>and bottom 10%<br>PRS |
|--------------------|-------------------------|-------------------------------------------------------------|
| PT (UKBB)          | 0.054                   | 0.899                                                       |
| Lsum (UKBB)        | 0.082                   | 1.142                                                       |
| TL-PRS-Lsum (UKBB) | 0.081                   | 1.119                                                       |
| PRS-CS (UKBB)      | 0.083                   | 1.047                                                       |
| TL-PRS-CS (UKBB)   | 0.082                   | 1.016                                                       |
| PT (BBJ)           | 0.046                   | 0.77                                                        |
| Lsum (BBJ)         | 0.065                   | 0.949                                                       |
| TL-Lsum (BBJ)      | 0.069                   | 0.95                                                        |
| PRS-CS (BBJ)       | 0.053                   | 0.896                                                       |
| TL-PRS-CS (BBJ)    | 0.053                   | 0.856                                                       |
| PT-multi           | 0.072                   | 0.958                                                       |
| <b>Lsum-multi</b>  | <b>0.094</b>            | <b>1.162</b>                                                |
| MTL-PRS-Lsum       | 0.088                   | 1.143                                                       |
| PRSCSx             | 0.093                   | 1.059                                                       |
| MTL-PRS-CS         | 0.09                    | 1.069                                                       |

## (e) SBP

| Model               | Prediction<br>R2 of PRS | Mean difference<br>between top 10%<br>and bottom 10%<br>PRS |
|---------------------|-------------------------|-------------------------------------------------------------|
| PT (UKBB)           | 0.021                   | 10.788                                                      |
| Lsum (UKBB)         | 0.035                   | 13.902                                                      |
| TL-PRS-Lsum (UKBB)  | 0.038                   | 16.129                                                      |
| PRS-CS (UKBB)       | 0.036                   | 12.569                                                      |
| TL-PRS-CS (UKBB)    | 0.035                   | 15.075                                                      |
| PT (BBJ)            | 0.005                   | 6.824                                                       |
| Lsum (BBJ)          | 0.01                    | 8.694                                                       |
| TL-Lsum (BBJ)       | 0.011                   | 7.373                                                       |
| PRS-CS (BBJ)        | 0.008                   | 7.161                                                       |
| TL-PRS-CS (BBJ)     | 0.009                   | 6.145                                                       |
| PT-multi            | 0.023                   | 12.404                                                      |
| Lsum-multi          | 0.038                   | 14.231                                                      |
| <b>MTL-PRS-Lsum</b> | <b>0.042</b>            | <b>16.455</b>                                               |
| PRSCSx              | 0.038                   | 14.306                                                      |
| MTL-PRS-CS          | 0.039                   | 15.322                                                      |

## (f) DBP

| Model              | Prediction<br>R2 of PRS | Mean difference<br>between top 10%<br>and bottom 10%<br>PRS |
|--------------------|-------------------------|-------------------------------------------------------------|
| PT (UKBB)          | 0.013                   | 4.376                                                       |
| Lsum (UKBB)        | 0.034                   | 6.667                                                       |
| TL-PRS-Lsum (UKBB) | 0.034                   | 6.914                                                       |
| PRS-CS (UKBB)      | 0.035                   | 5.91                                                        |
| TL-PRS-CS (UKBB)   | 0.036                   | 7.098                                                       |
| PT (BBJ)           | 0.001                   | 0.973                                                       |
| Lsum (BBJ)         | 0.003                   | 1.855                                                       |
| TL-Lsum (BBJ)      | 0.004                   | 2.012                                                       |
| PRS-CS (BBJ)       | 0.003                   | 3.145                                                       |
| TL-PRS-CS (BBJ)    | 0.006                   | 2.498                                                       |
| PT-multi           | 0.013                   | 3.396                                                       |
| Lsum-multi         | 0.033                   | 6.227                                                       |
| MTL-PRS-Lsum       | 0.035                   | 7.529                                                       |
| PRSCSx             | 0.034                   | 6.404                                                       |
| <b>MTL-PRS-CS</b>  | <b>0.036</b>            | <b>7.573</b>                                                |

## (g) CAD

| Model              | Prediction<br>pseudo<br>R2 of<br>PRS | AUC          | Risk ratio<br>between top<br>10% and<br>bottom 10%<br>PRS |
|--------------------|--------------------------------------|--------------|-----------------------------------------------------------|
| PT (UKBB)          | 0.014                                | 0.747        | 2.381                                                     |
| Lsum (UKBB)        | 0.023                                | 0.752        | 2.227                                                     |
| TL-PRS-Lsum (UKBB) | 0.021                                | 0.751        | 2.25                                                      |
| PRS-CS (UKBB)      | 0.022                                | 0.752        | 4.231                                                     |
| TL-PRS-CS (UKBB)   | 0.031                                | 0.756        | 3                                                         |
| PT (BBJ)           | 0.007                                | 0.743        | 1.68                                                      |
| Lsum (BBJ)         | 0.022                                | 0.75         | 2.611                                                     |
| TL-Lsum (BBJ)      | 0.018                                | 0.75         | 2.273                                                     |
| PRS-CS (BBJ)       | 0.023                                | 0.751        | 2.8                                                       |
| TL-PRS-CS (BBJ)    | 0.032                                | 0.757        | 3.067                                                     |
| PT-multi           | 0.019                                | 0.751        | 2.882                                                     |
| Lsum-multi         | 0.036                                | 0.758        | 2.526                                                     |
| MTL-PRS-Lsum       | 0.029                                | 0.756        | 3.267                                                     |
| PRSCSx             | 0.036                                | 0.758        | 3.688                                                     |
| <b>MTL-PRS-CS</b>  | <b>0.043</b>                         | <b>0.763</b> | <b>5</b>                                                  |

## (h) Type II diabetes

| Model              | Prediction<br>pseudo<br>R2 of<br>PRS | AUC          | Risk ratio<br>between top<br>10% and<br>bottom 10%<br>PRS |
|--------------------|--------------------------------------|--------------|-----------------------------------------------------------|
| PT (UKBB)          | 0.012                                | 0.692        | 2.44                                                      |
| Lsum (UKBB)        | 0.031                                | 0.708        | 2.8                                                       |
| TL-PRS-Lsum (UKBB) | 0.033                                | 0.708        | 2.917                                                     |
| PRS-CS (UKBB)      | 0.033                                | 0.71         | 2.68                                                      |
| TL-PRS-CS (UKBB)   | 0.037                                | 0.712        | 3.238                                                     |
| PT (BBJ)           | 0.014                                | 0.693        | 1.867                                                     |
| Lsum (BBJ)         | 0.03                                 | 0.707        | 2.75                                                      |
| TL-Lsum (BBJ)      | 0.029                                | 0.707        | 4.062                                                     |
| PRS-CS (BBJ)       | 0.035                                | 0.708        | 2.846                                                     |
| TL-PRS-CS (BBJ)    | 0.047                                | 0.717        | 3.889                                                     |
| PT-multi           | 0.023                                | 0.701        | 2.583                                                     |
| Lsum-multi         | 0.048                                | 0.72         | 4.688                                                     |
| MTL-PRS-Lsum       | 0.049                                | 0.72         | 8.444                                                     |
| PRSCSx             | 0.048                                | 0.719        | 3.217                                                     |
| <b>MTL-PRS-CS</b>  | <b>0.056</b>                         | <b>0.723</b> | <b>5.286</b>                                              |

**Table S5.** Prediction accuracy of different PRS construction methods in analyses of eight traits in the African cohort of UK Biobank. The approach with highest prediction  $R^2$  is highlighted with bold.

(a) HDL

| Model              | Prediction R <sup>2</sup> of PRS | Mean difference between top 10% and bottom 10% PRS |
|--------------------|----------------------------------|----------------------------------------------------|
| PT (UKBB)          | 0.045                            | 0.228                                              |
| Lsum (UKBB)        | 0.042                            | 0.287                                              |
| TL-PRS-Lsum (UKBB) | 0.045                            | 0.31                                               |
| PRS-CS (UKBB)      | 0.05                             | 0.236                                              |
| TL-PRS-CS (UKBB)   | 0.054                            | 0.265                                              |
| PT (BBJ)           | 0.035                            | 0.259                                              |
| Lsum (BBJ)         | 0.047                            | 0.345                                              |
| TL-Lsum (BBJ)      | 0.05                             | 0.347                                              |
| PRS-CS (BBJ)       | 0.047                            | 0.265                                              |
| TL-PRS-CS (BBJ)    | 0.048                            | 0.325                                              |
| PT-multi           | 0.052                            | 0.24                                               |
| Lsum-multi         | 0.062                            | 0.341                                              |
| MTL-PRS-Lsum       | 0.064                            | 0.317                                              |
| PRSCSx             | 0.071                            | 0.321                                              |
| <b>MTL-PRS-CS</b>  | <b>0.072</b>                     | <b>0.33</b>                                        |

## (b) LDL

| Model               | Prediction<br>R2 of PRS | Mean difference<br>between top 10%<br>and bottom 10%<br>PRS |
|---------------------|-------------------------|-------------------------------------------------------------|
| PT (UKBB)           | 0.012                   | 0.388                                                       |
| Lsum (UKBB)         | 0.033                   | 0.625                                                       |
| TL-PRS-Lsum (UKBB)  | 0.058                   | 0.779                                                       |
| PRS-CS (UKBB)       | 0.022                   | 0.552                                                       |
| TL-PRS-CS (UKBB)    | 0.028                   | 0.506                                                       |
| PT (BBJ)            | 0.028                   | 0.474                                                       |
| Lsum (BBJ)          | 0.048                   | 0.595                                                       |
| TL-Lsum (BBJ)       | 0.068                   | 0.795                                                       |
| PRS-CS (BBJ)        | 0.023                   | 0.421                                                       |
| TL-PRS-CS (BBJ)     | 0.028                   | 0.565                                                       |
| PT-multi            | 0.03                    | 0.531                                                       |
| Lsum-multi          | 0.052                   | 0.727                                                       |
| <b>MTL-PRS-Lsum</b> | <b>0.068</b>            | <b>0.926</b>                                                |
| PRSCSx              | 0.037                   | 0.662                                                       |
| MTL-PRS-CS          | 0.044                   | 0.721                                                       |



## (c) BMI

| Model              | Prediction<br>R2 of PRS | Mean difference<br>between top 10%<br>and bottom 10%<br>PRS |
|--------------------|-------------------------|-------------------------------------------------------------|
| PT (UKBB)          | 0.028                   | 3.416                                                       |
| Lsum (UKBB)        | 0.038                   | 3.762                                                       |
| TL-PRS-Lsum (UKBB) | 0.039                   | 4.035                                                       |
| PRS-CS (UKBB)      | 0.032                   | 3.48                                                        |
| TL-PRS-CS (UKBB)   | 0.034                   | 3.399                                                       |
| PT (BBJ)           | 0.008                   | 1.242                                                       |
| Lsum (BBJ)         | 0.013                   | 1.911                                                       |
| TL-Lsum (BBJ)      | 0.013                   | 2.466                                                       |
| PRS-CS (BBJ)       | 0.012                   | 1.946                                                       |
| TL-PRS-CS (BBJ)    | 0.02                    | 2.677                                                       |
| PT-multi           | 0.031                   | 3                                                           |
| <b>Lsum-multi</b>  | <b>0.043</b>            | <b>4.018</b>                                                |
| MTL-PRS-Lsum       | 0.043                   | 3.676                                                       |
| PRSCSx             | 0.036                   | 4.006                                                       |
| MTL-PRS-CS         | 0.042                   | 4.057                                                       |

(d) TG

| Model              | Prediction<br>R2 of PRS | Mean difference<br>between top 10%<br>and bottom 10%<br>PRS |
|--------------------|-------------------------|-------------------------------------------------------------|
| PT (UKBB)          | 0.006                   | 0.172                                                       |
| Lsum (UKBB)        | 0.011                   | 0.271                                                       |
| TL-PRS-Lsum (UKBB) | 0.011                   | 0.263                                                       |
| PRS-CS (UKBB)      | 0.015                   | 0.245                                                       |
| TL-PRS-CS (UKBB)   | 0.019                   | 0.409                                                       |
| PT (BBJ)           | 0.006                   | 0.207                                                       |
| Lsum (BBJ)         | 0.009                   | 0.167                                                       |
| TL-Lsum (BBJ)      | 0.009                   | 0.177                                                       |
| PRS-CS (BBJ)       | 0.004                   | 0.138                                                       |
| TL-PRS-CS (BBJ)    | 0.008                   | 0.209                                                       |
| PT-multi           | 0.009                   | 0.233                                                       |
| Lsum-multi         | 0.013                   | 0.267                                                       |
| MTL-PRS-Lsum       | 0.011                   | 0.21                                                        |
| PRSCSx             | 0.016                   | 0.257                                                       |
| <b>MTL-PRS-CS</b>  | <b>0.02</b>             | <b>0.378</b>                                                |

## (e) SBP

| Model                   | Prediction<br>R2 of PRS | Mean difference<br>between top 10%<br>and bottom 10%<br>PRS |
|-------------------------|-------------------------|-------------------------------------------------------------|
| PT (UKBB)               | 0.003                   | 4.451                                                       |
| Lsum (UKBB)             | 0.011                   | 7.015                                                       |
| TL-PRS-Lsum (UKBB)      | 0.011                   | 7.015                                                       |
| PRS-CS (UKBB)           | 0.012                   | 8.769                                                       |
| <b>TL-PRS-CS (UKBB)</b> | <b>0.013</b>            | <b>9.677</b>                                                |
| PT (BBJ)                | 0.001                   | 3.39                                                        |
| Lsum (BBJ)              | 0.001                   | 3.215                                                       |
| TL-Lsum (BBJ)           | 0.002                   | 1.544                                                       |
| PRS-CS (BBJ)            | 0.004                   | 4.379                                                       |
| TL-PRS-CS (BBJ)         | 0.003                   | 2.579                                                       |
| PT-multi                | 0.003                   | 4.826                                                       |
| Lsum-multi              | 0.011                   | 7.113                                                       |
| MTL-PRS-Lsum            | 0.011                   | 6.713                                                       |
| PRSCSx                  | 0.013                   | 8.61                                                        |
| MTL-PRS-CS              | 0.012                   | 7.897                                                       |

## (f) DBP

| Model                   | Prediction<br>R2 of PRS | Mean difference<br>between top 10%<br>and bottom 10%<br>PRS |
|-------------------------|-------------------------|-------------------------------------------------------------|
| PT (UKBB)               | 0.001                   | 1.872                                                       |
| Lsum (UKBB)             | 0.004                   | 2.579                                                       |
| TL-PRS-Lsum (UKBB)      | 0.004                   | 2.579                                                       |
| PRS-CS (UKBB)           | 0.006                   | 2.456                                                       |
| <b>TL-PRS-CS (UKBB)</b> | <b>0.009</b>            | <b>3.338</b>                                                |
| PT (BBJ)                | 0                       | 1.046                                                       |
| Lsum (BBJ)              | 0.003                   | 1.913                                                       |
| TL-Lsum (BBJ)           | 0.003                   | 1.785                                                       |
| PRS-CS (BBJ)            | 0.002                   | 2.082                                                       |
| TL-PRS-CS (BBJ)         | 0.002                   | 3.39                                                        |
| PT-multi                | 0.002                   | 2.523                                                       |
| Lsum-multi              | 0.006                   | 2.426                                                       |
| MTL-PRS-Lsum            | 0.006                   | 2.713                                                       |
| PRSCSx                  | 0.007                   | 3.944                                                       |
| MTL-PRS-CS              | 0.009                   | 3.19                                                        |

## (g) CAD

| Model              | Prediction<br>pseudo<br>R2 of<br>PRS | AUC of      | Risk ratio<br>between top<br>10% and<br>bottom 10%<br>PRS |
|--------------------|--------------------------------------|-------------|-----------------------------------------------------------|
| <b>PT (UKBB)</b>   | <b>0.028</b>                         | <b>0.72</b> | <b>3.167</b>                                              |
| Lsum (UKBB)        | 0.003                                | 0.694       | 4                                                         |
| TL-PRS-Lsum (UKBB) | 0.01                                 | 0.704       | 2.6                                                       |
| PRS-CS (UKBB)      | 0.01                                 | 0.705       | 4.25                                                      |
| TL-PRS-CS (UKBB)   | 0.016                                | 0.71        | 3.6                                                       |
| PT (BBJ)           | 0.002                                | 0.693       | 1.556                                                     |
| Lsum (BBJ)         | 0.003                                | 0.695       | 3.5                                                       |
| TL-Lsum (BBJ)      | 0.004                                | 0.695       | 3                                                         |
| PRS-CS (BBJ)       | 0.006                                | 0.698       | 1.75                                                      |
| TL-PRS-CS (BBJ)    | 0.005                                | 0.696       | 2.5                                                       |
| PT-multi           | 0.019                                | 0.713       | 4.667                                                     |
| Lsum-multi         | 0.005                                | 0.697       | 2.4                                                       |
| MTL-PRS-Lsum       | 0.008                                | 0.699       | 2.167                                                     |
| PRSCSx             | 0.009                                | 0.701       | 2                                                         |
| MTL-PRS-CS         | 0.02                                 | 0.712       | 5                                                         |

## (h) Type II diabetes

| Model              | Prediction pseudo R2 of PRS | AUC          | Risk ratio between top 10% and bottom 10% PRS |
|--------------------|-----------------------------|--------------|-----------------------------------------------|
| PT (UKBB)          | 0.005                       | 0.734        | 1.6                                           |
| Lsum (UKBB)        | 0.012                       | 0.74         | 1.5                                           |
| TL-PRS-Lsum (UKBB) | 0.009                       | 0.741        | 1.706                                         |
| PRS-CS (UKBB)      | 0.022                       | 0.745        | 2.455                                         |
| TL-PRS-CS (UKBB)   | 0.022                       | 0.748        | 4.5                                           |
| PT (BBJ)           | 0.005                       | 0.735        | 1.643                                         |
| Lsum (BBJ)         | 0.003                       | 0.732        | 1.533                                         |
| TL-Lsum (BBJ)      | 0.002                       | 0.732        | 1.636                                         |
| PRS-CS (BBJ)       | 0.007                       | 0.732        | 1.923                                         |
| TL-PRS-CS (BBJ)    | 0.018                       | 0.739        | 2.357                                         |
| PT-multi           | 0.009                       | 0.737        | 1.412                                         |
| Lsum-multi         | 0.011                       | 0.738        | 1.643                                         |
| MTL-PRS-Lsum       | 0.012                       | 0.739        | 1.643                                         |
| PRSCSx             | 0.021                       | 0.74         | 1.6                                           |
| <b>MTL-PRS-CS</b>  | <b>0.026</b>                | <b>0.747</b> | <b>3.5</b>                                    |

Table S6. The top three methods for all 8 traits in the South Asian and African ancestries in terms of prediction  $R^2$ . Single-source prediction methods (PT, Lsum, TL-PRS-Lsum, PRS-CS, TL-PRS-CS) based on UKBB and BBJ GWAS results and multi-source PRS methods (PT-multi, Lsum-multi, MTL-PRS-Lsum, PRS-CS<sub>x</sub>, MTL-PRS-CS) were included in the comparison and our approaches were highlighted using bold.

| Target population | trait | Best approach (rank 1)  | Rank 2                 | Rank 3                   |
|-------------------|-------|-------------------------|------------------------|--------------------------|
| South Asian       | HDL   | <b>MTL-PRS-CS</b>       | <b>MTL-PRS-Lsum</b>    | <b>TL-PRS-CS(UKBB)</b>   |
|                   | LDL   | <b>MTL-PRS-Lsum</b>     | Lsum-multi             | <b>MTL-PRS-CS</b>        |
|                   | BMI   | Lsum-multi              | <b>MTL-PRS-Lsum</b>    | <b>MTL-PRS-CS</b>        |
|                   | TG    | Lsum-multi              | PRS-CS <sub>x</sub>    | <b>MTL-PRS-CS</b>        |
|                   | SBP   | <b>MTL-PRS-Lsum</b>     | <b>MTL-PRS-CS</b>      | PRS-CS <sub>x</sub>      |
|                   | DBP   | <b>MTL-PRS-CS</b>       | <b>TL-PRS-CS(UKBB)</b> | <b>MTL-PRS-Lsum</b>      |
|                   | CAD   | <b>MTL-PRS-CS</b>       | PRS-CS <sub>x</sub>    | Lsum-multi               |
|                   | T2D   | <b>MTL-PRS-CS</b>       | <b>MTL-PRS-Lsum</b>    | PRS-CS <sub>x</sub>      |
| African           | HDL   | <b>MTL-PRS-CS</b>       | PRS-CS <sub>x</sub>    | <b>MTL-PRS-Lsum</b>      |
|                   | LDL   | <b>TL-PRS-Lsum(BBJ)</b> | <b>MTL-PRS-Lsum</b>    | <b>TL-PRS-Lsum(UKBB)</b> |
|                   | BMI   | <b>MTL-PRS-Lsum</b>     | Lsum-multi             | <b>MTL-PRS-CS</b>        |
|                   | TG    | <b>MTL-PRS-CS</b>       | <b>TL-PRS-CS(UKBB)</b> | PRS-CS <sub>x</sub>      |
|                   | SBP   | <b>TL-PRS-CS(UKBB)</b>  | PRS-CS <sub>x</sub>    | <b>MTL-PRS-CS</b>        |
|                   | DBP   | <b>MTL-PRS-CS</b>       | <b>TL-PRS-CS(UKBB)</b> | PRS-CS <sub>x</sub>      |
|                   | CAD   | PT(UKBB)                | <b>MTL-PRS-CS</b>      | PT-multi                 |
|                   | T2D   | <b>MTL-PRS-CS</b>       | PRS-CS(UKBB)           | <b>TL-PRS-CS(UKBB)</b>   |
